# Supplementary material for: Use of and Beliefs About Mobile Phone Apps for Diabetes Self-Management: Surveys of People in a Hospital Diabetes Clinic and Diabetes Health Professionals in New Zealand
Source: PubMed Central journal article supplement (PMC5511364; doi:10.2196/mhealth.7263), 2017-06-30
Supplement: mhealth_v5i6e85_app2.pdf [file mhealth_v5i6e85_app2.pdf]

## Diabetes Smartphone Application (App) Survey for NZSSD

We are performing a survey to establish whether health professionals treating people with diabetes in New Zealand recommend smartphone applications (apps) to assist diabetes self-management and which features of diabetes apps health professionals consider important.

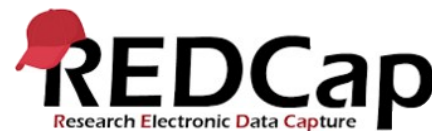

### 1. What is your profession?

- Nurse
- Dietician
- Doctor
- Podiatrist
- Other, please specify: \_\_\_\_\_

### 2. What is your age?

- 21-30
- 31-40
- 41-50
- 51-60
- 61+

### 3. How many years has your professional role focused on treating people with diabetes?

- <1 year
- 2-5 years
- 6-10 years
- >10 years

### 4. Do you own a smartphone?

- Yes
- No

### 5. Have you ever recommended a smartphone application (app) for diabetes self-management?

- Yes. If yes, which smartphone app(s) did you recommend? \_\_\_\_\_
- No

### 6. Please rate how useful you think these diabetes app features are for people with diabetes to enhance their diabetes self-management:

|                                                                                       | Not at all useful        | Slightly useful          | Useful                   | Very useful              | Extremely useful         |
|---------------------------------------------------------------------------------------|--------------------------|--------------------------|--------------------------|--------------------------|--------------------------|
| Information about diabetes e.g. dietary advice, contact information for diabetes team | <input type="checkbox"/> | <input type="checkbox"/> | <input type="checkbox"/> | <input type="checkbox"/> | <input type="checkbox"/> |
| Individualised guidelines for ideal blood glucose levels                              | <input type="checkbox"/> | <input type="checkbox"/> | <input type="checkbox"/> | <input type="checkbox"/> | <input type="checkbox"/> |
| Diary for blood glucose and carbohydrate intake                                       | <input type="checkbox"/> | <input type="checkbox"/> | <input type="checkbox"/> | <input type="checkbox"/> | <input type="checkbox"/> |
| Reminders to check blood glucose, take medications                                    | <input type="checkbox"/> | <input type="checkbox"/> | <input type="checkbox"/> | <input type="checkbox"/> | <input type="checkbox"/> |
| Insulin calculation device                                                            | <input type="checkbox"/> | <input type="checkbox"/> | <input type="checkbox"/> | <input type="checkbox"/> | <input type="checkbox"/> |

### 7. How confident do you feel in recommending diabetes apps to patients in the following categories?

|                                                             | Not at all confident     | Not confident            | Not sure                 | Confident                | Very confident           |
|-------------------------------------------------------------|--------------------------|--------------------------|--------------------------|--------------------------|--------------------------|
| Diabetes education apps                                     | <input type="checkbox"/> | <input type="checkbox"/> | <input type="checkbox"/> | <input type="checkbox"/> | <input type="checkbox"/> |
| Blood glucose diaries                                       | <input type="checkbox"/> | <input type="checkbox"/> | <input type="checkbox"/> | <input type="checkbox"/> | <input type="checkbox"/> |
| Apps with reminders for medication or blood glucose changes | <input type="checkbox"/> | <input type="checkbox"/> | <input type="checkbox"/> | <input type="checkbox"/> | <input type="checkbox"/> |
| Insulin calculation devices                                 | <input type="checkbox"/> | <input type="checkbox"/> | <input type="checkbox"/> | <input type="checkbox"/> | <input type="checkbox"/> |

### 8. Thank you for completing the survey. Please add any comments or feedback:
